# Supplementary material
Source: PubMed Central journal article supplement (PMC3504484)
Supplement: jm300801u_si_001.pdf [file jm300801u_si_001.pdf]

# Supporting Information

## Design, synthesis and structure-activity relationships of highly potent 5-HT<sub>3</sub> receptor ligands

Mark H. P. Verheij<sup>§#</sup>, Andrew J. Thompson<sup>§#</sup>, Jacqueline E. van Muijlwijk-Koezen<sup>§</sup>, Sarah C. R Lummis<sup>§</sup>, Rob Leurs<sup>§</sup> and Iwan J. P. de Esch<sup>§\*</sup>

#These authors contributed equally to this work.

§Leiden/Amsterdam Center of Drug Research (LACDR), Amsterdam Institute for Molecules Medicines and Systems (AIMMS), Division of Medicinal Chemistry, Faculty of Sciences, VU University Amsterdam, Amsterdam, The Netherlands.

§Department of Biochemistry, University of Cambridge, Cambridge, UK

### Table of contents:

|           |         |
|-----------|---------|
| Figure S1 | Page S2 |
| Figure S2 | Page S2 |
| Table S1  | Page S3 |
| Table S2  | Page S4 |
| Table S3  | Page S5 |

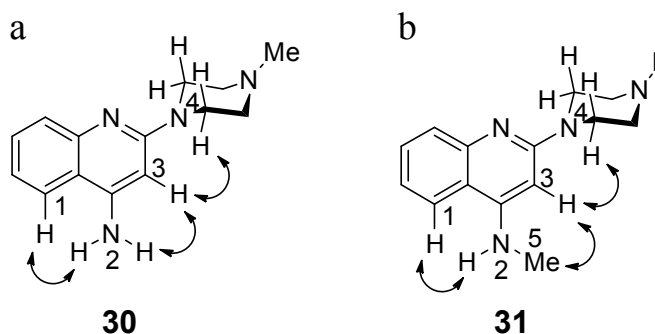

**Figure S1:** NOESY couplings that were observed using 2D  $^1\text{H}$  NMR measurements on compounds **30** and **31**. (a) The correct regio isomers of compound **30**. The  $^1\text{H}$  NMR signal at 6.16 ppm (s, 1H) can be ascribed to proton 3 since it couples to both the multiplet of 4 at 3.72-3.63 ppm (m, 4H) as well as to the signal of the aniline protons of 2 at 4.51 ppm (br s, 2H). Furthermore, the aniline proton of 2 at 4.51 ppm (br s, 2H) couples with the aromatic proton of 1 at 7.43-7.31 ppm (m, 1H). In addition, there is no coupling observed between the signals of the aromatic proton of 1 7.43-7.31 ppm (m, 1H) and the multiplet of 4 at 3.72-3.63 ppm (m, 4H). (b) The correct regio isomers of compound **31**. The  $^1\text{H}$  NMR signal at 5.92 ppm (s, 1H) can be ascribed to proton 3 since it couples to both the multiplet of 4 at 3.79-3.69 ppm (m, 4H) as well as to the signal of the methylaniline protons of 5 at 3.00 ppm (d, 3H). Furthermore, the aniline proton of 2 at 4.89 ppm (br s, 1H) couples with the aromatic proton of 1 at 7.52-7.43 ppm (m, 2H). Interestingly, there is no coupling observed between proton 1 and the methylaniline protons of 5. In addition, no coupling is observed between aniline proton 2 and aromatic proton 3 suggesting that the rotamer drawn above is preferred. Finally, there is no coupling observed between the signals of the aromatic proton of 1 7.43-7.31 ppm (m, 1H) and the multiplet of 4 at 3.72-3.63 ppm (m, 4H).

|        |     |                                                                                                                         |     |
|--------|-----|-------------------------------------------------------------------------------------------------------------------------|-----|
| Q8WSF8 | -4  | D D D K L H S Q A N L M R L K S D L F N R S P M Y P G P T K D D - P L T V T L G F T L Q D I V K A D S S T N E V D L V Y | 54  |
| Q7KZM7 | 30  | R S R N T T R P A L L R L S D Y L L T N Y R K G V R P V R D W R K P T T V S I D V I V Y A I L N V D E K N Q V L T T Y I | 89  |
| Q8WSF8 | 55  | Y E Q Q R W K L N S L M W D P N E Y G N I I D F R I S A A D I W I P D - I I A Y S S I R P V Q V L S P Q I A V V I H D G | 113 |
| Q7KZM7 | 90  | W Y R Q Y W T D E F L Q W N P E D F D N I T K L S I P T D S I W V P D I L I N E F V - D V G K S P N I P Y V Y I R H Q G | 148 |
| Q8WSF8 | 114 | S V M F I P A Q R L S F M C D P T G V D S E E G - A T C A V K F G S W V Y S G F E I D L K T D T - - D - Q V D L S S Y Y | 169 |
| Q7KZM7 | 149 | E V Q N Y K P L Q V V T A C S L D I Y N F P F D V Q N C S L T F T S W L H T I Q D I N I S L W R L P E K V K S D R S V F | 208 |
| Q8WSF8 | 170 | A S - S K Y E I L S A T Q T R Q V Q H Y S C C P E P Y I D V N L V V K F R E R R                                         | 208 |
| Q7KZM7 | 209 | M N Q G E W E L L G V L P Y F R E F S - M E S S N Y Y A E M K F Y V V I R R R P                                         | 247 |

**Figure S2:** Sequence alignment for *Ac*-AChBP (Q8WSF8) and 5-HT<sub>3A</sub>R (Q7KZM7). 5-HT<sub>3A</sub>R residues shown in Figure 3 and their corresponding residues in *Ac*-AChBP are highlighted.

**Table S1: Cross-target pharmacology of compound 22 at a concentration of 0.1  $\mu$ M.**

| Receptor                                                 | % Inhibition of Control Specific Binding |                 |      |
|----------------------------------------------------------|------------------------------------------|-----------------|------|
|                                                          | 1 <sup>st</sup> <sup>c</sup>             | 2 <sup>nd</sup> | Mean |
| GABAA1 ( $\alpha$ 1, $\beta$ 2, $\gamma$ 2) <sup>a</sup> | 8.5                                      | 4.6             | 6.6  |
| Glycine <sup>b</sup>                                     | 4.1                                      | 17.0            | 10.5 |
| nACh ( $\alpha$ 4 $\beta$ 2) <sup>a</sup>                | 8.3                                      | -4.4            | 1.9  |
| nACh ( $\alpha$ 7) <sup>a</sup>                          | 30.7                                     | 31.9            | 31.3 |
| 5-HT <sub>1A</sub> <sup>a</sup>                          | 11.9                                     | -1.8            | 5.0  |
| 5-HT <sub>1B</sub> <sup>b</sup>                          | -4.4                                     | -11.8           | -8.1 |
| 5-HT <sub>1D</sub> <sup>b</sup>                          | 7.7                                      | -1.2            | 3.3  |
| 5-HT <sub>2A</sub> <sup>a</sup>                          | 4.0                                      | 9.4             | 6.7  |
| 5-HT <sub>2B</sub> <sup>a</sup>                          | 42.8                                     | 43.4            | 43.1 |
| 5-HT <sub>2C</sub> <sup>a</sup>                          | -3.1                                     | -10.0           | -6.5 |
| 5-HT <sub>4E</sub> <sup>a</sup>                          | -2.9                                     | 1.8             | -0.5 |
| 5-HT <sub>6</sub> <sup>a</sup>                           | -5.1                                     | 6.3             | 0.6  |
| 5-HT <sub>7</sub> <sup>a</sup>                           | -3.3                                     | -6.8            | -5.0 |

<sup>a</sup> Human receptor; <sup>b</sup> Rat receptor; <sup>c</sup> Results are expressed as a percent inhibition of control specific binding obtained in the presence of compound **22**. Results showing an inhibition < 15% considered non binding.

**Table S2: Reference Compounds.**

| Receptor                         | Compound   | <i>IC</i> <sub>50</sub> (M) | <i>K</i> <sub>i</sub> (M) | <i>n</i> <sub>H</sub> |
|----------------------------------|------------|-----------------------------|---------------------------|-----------------------|
| <b>GABA<sub>A</sub> (α1β2γ2)</b> |            |                             |                           |                       |
|                                  | Muscimol   | 7.2E-08                     | 4.8E-08                   | 0.9                   |
| <b>Glycine</b>                   |            |                             |                           |                       |
|                                  | Strychnine | 9.5E-09                     | 8.6E-09                   | 0.7                   |
| <b>nACh (α4β2)</b>               |            |                             |                           |                       |
|                                  | Nicotine   | 4.3E-09                     | 1.4E-09                   | 0.9                   |
| <b>nACh (α7)</b>                 |            |                             |                           |                       |
|                                  | Nicotine   | 2.0E-10                     | 1.5E-10                   | 0.6                   |
| <b>5-HT<sub>1A</sub></b>         |            |                             |                           |                       |
|                                  | 8-OH-DPAT  | 3.7E-10                     | 2.3E-10                   | 1.1                   |
| <b>5-HT<sub>1B</sub></b>         |            |                             |                           |                       |
|                                  | Serotonin  | 7.8E-09                     | 4.8E-09                   | 0.8                   |
| <b>5-HT<sub>1D</sub></b>         |            |                             |                           |                       |
|                                  | Serotonin  | 1.4E-09                     | 4.7E-10                   | 1.0                   |
| <b>5-HT<sub>2A</sub></b>         |            |                             |                           |                       |
|                                  | (±)DOI     | 5.0E-10                     | 3.7E-10                   | 0.6                   |
| <b>5-HT<sub>2B</sub></b>         |            |                             |                           |                       |
|                                  | (±)DOI     | 6.6E-09                     | 3.3E-09                   | 0.8                   |
| <b>5-HT<sub>2C</sub></b>         |            |                             |                           |                       |
|                                  | (±)DOI     | 6.6E-10                     | 5.9E-10                   | 0.9                   |
| <b>5-HT<sub>4E</sub></b>         |            |                             |                           |                       |
|                                  | Serotonin  | 3.4E-07                     | 1.1E-07                   | 0.8                   |
| <b>5-HT<sub>6</sub></b>          |            |                             |                           |                       |
|                                  | Serotonin  | 1.7E-07                     | 7.9E-08                   | 0.9                   |
| <b>5-HT<sub>7</sub></b>          |            |                             |                           |                       |
|                                  | Serotonin  | 3.1E-10                     | 1.1E-10                   | 1.1                   |

The *IC*<sub>50</sub> values (concentration causing a half-maximal inhibition of specific binding) and Hill coefficients (*n*<sub>H</sub>) were determined by non-linear regression analysis of the competition curves generated with mean replicate values using the Hill equation:

$$Y = D + \left[ \frac{A - D}{1 + (C/C_{50})^{nH}} \right]$$

where Y = specific binding, A = left asymptote of the curve, D = right asymptote of the curve, C = compound concentration and *n*<sub>H</sub> = slope factor. This analysis was performed using Hill software (Cerep) and validated by comparison with SigmaPlot® 4.0 for Windows® (© 1997 by SPSS Inc.). The inhibition constants (*K*<sub>i</sub>) were calculated using the Cheng Prusoff equation:

$$K_i = \frac{IC_{50}}{(1 + L/K_d)}$$

where L = concentration of radioligand in the assay, and *K*<sub>d</sub> = affinity of the radioligand for the receptor.

**Table S3: Binding assays**

| <b>Receptor</b>                                                                         | <b>Source</b>                     | <b>Ligand</b>                                       | <b>Conc.</b> | <b>Kd</b> | <b>Non Specific</b>      | <b>Incubation</b> |
|-----------------------------------------------------------------------------------------|-----------------------------------|-----------------------------------------------------|--------------|-----------|--------------------------|-------------------|
| <b>GABAA1</b><br><b>(<math>\alpha</math>1,<math>\beta</math>2,<math>\gamma</math>2)</b> | Human recombinant (CHO cells)     | [ <sup>3</sup> H]muscimol                           | 15 nM        | 30 nM     | Muscimol (10 $\mu$ M)    | 120 min RT        |
| <b>Glycine</b>                                                                          | Rat spinal cord                   | [ <sup>3</sup> H]strychnine                         | 2 nM         | 20 nM     | Strychnine (100 $\mu$ M) | 15 min 0°C        |
| <b>nACh</b><br><b>(<math>\alpha</math>4<math>\beta</math>2)</b>                         | Human recombinant (SH-SY5Y cells) | [ <sup>3</sup> H]cytisine                           | 0.6 nM       | 0.3 nM    | Nicotine (10 $\mu$ M)    | 120 min 4°C       |
| <b>nACh (<math>\alpha</math>7)</b>                                                      | Human recombinant (HEK-293 cells) | [ <sup>3</sup> H]epibatidine                        | 3 nM         | 5.8 nM    | Nicotine (3mM)           | 120 min 4°C       |
| <b>5-HT<sub>1A</sub></b>                                                                | Human recombinant (HEK-293 cells) | [ <sup>3</sup> H]8-OH-DPAT                          | 0.3 nM       | 0.5 nM    | 8-OH-DPAT (10 $\mu$ M)   | 60 min RT         |
| <b>5-HT<sub>1B</sub></b>                                                                | Rat cerebral cortex               | [ <sup>125</sup> I]CYP (+ 30 $\mu$ M isoproterenol) | 0.1 nM       | 0.16 nM   | Serotonin (10 $\mu$ M)   | 120 min 37°C      |
| <b>5-HT<sub>1D</sub></b>                                                                | Rat recombinant (CHO cells)       | [ <sup>3</sup> H]serotonin                          | 1 nM         | 0.5 nM    | Serotonin (10 $\mu$ M)   | 60 min RT         |
| <b>5-HT<sub>2A</sub></b>                                                                | Human recombinant (HEK-293 cells) | [ <sup>125</sup> I]( $\pm$ )DOI                     | 0.1 nM       | 0.3 nM    | ( $\pm$ )DOI (1 $\mu$ M) | 60 min RT         |
| <b>5-HT<sub>2B</sub></b>                                                                | Human recombinant (CHO cells)     | [ <sup>125</sup> I]( $\pm$ )DOI                     | 0.2 nM       | 0.2 nM    | ( $\pm$ )DOI (1 $\mu$ M) | 60 min RT         |
| <b>5-HT<sub>2C</sub></b>                                                                | Human recombinant (HEK-293 cells) | [ <sup>125</sup> I]( $\pm$ )DOI                     | 0.1 nM       | 0.9 nM    | ( $\pm$ )DOI (1 $\mu$ M) | 60 min 37°C       |
| <b>5-HT<sub>4E</sub></b>                                                                | Human recombinant (CHO cells)     | [ <sup>3</sup> H]GR 113808                          | 0.3 nM       | 0.15 nM   | Serotonin (100 $\mu$ M)  | 60 min 37°C       |
| <b>5-HT<sub>6</sub></b>                                                                 | Human recombinant (CHO cells)     | [ <sup>3</sup> H]LSD                                | 2 nM         | 1.8 nM    | Serotonin (100 $\mu$ M)  | 120 min 37°C      |
| <b>5-HT<sub>7</sub></b>                                                                 | Human recombinant (CHO cells)     | [ <sup>3</sup> H]LSD                                | 4 nM         | 2.3 nM    | Serotonin (10 $\mu$ M)   | 120 min RT        |

$K_d$  = affinity of the radioligand for the receptor.
